# Supplementary material
Source: ML conference proceedings conference paper supplement (https://aclanthology.org/2024.semeval-1.127)

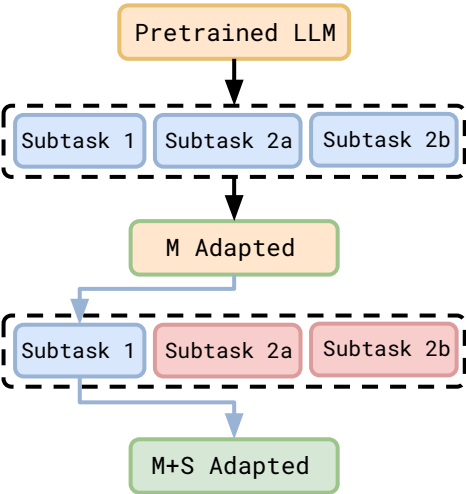

Supplement: SupplementaryMaterial [file 2024.semeval-1.127.SupplementaryMaterial.zip]
